# Supplementary material for: Coherent control of interlayer vibrations in Bi2Se3 van der Waals thin-films
Source: Royal Society of Chemistry journal article supplement (doi:10.1039/d1nr05075c), 2021-01-01
Supplement: d1nr05075c1.pdf [file d1nr05075c1.pdf]

## **Supplementary Information**

# “Coherent Control of Interlayer Vibrations in $\text{Bi}_2\text{Se}_3$ van der Waals Thin-Films”

Tae Gwan Park<sup>1</sup>, Hong Ryeol Na<sup>2</sup>, Seung-Hyun Chun<sup>2</sup>, Won Bae Cho<sup>3</sup>, Sunghun Lee<sup>2,\*</sup> and  
Fabian Rotermund<sup>1,\*</sup>

<sup>1</sup>Department of Physics, Korea Advanced Institute of Science and Technology (KAIST),  
Daejeon 34141, Republic of Korea

<sup>2</sup>Department of Physics and Astronomy, Sejong University, Seoul 05006, Korea

<sup>3</sup>Welfare & Medical ICT Research Department, Electronics and Telecommunications  
Research Institute (ETRI), Daejeon 34129, Korea

\*Correspondence to: kshlee@sejong.ac.kr (S.L.) and rotermund@kaist.ac.kr (F.R.)

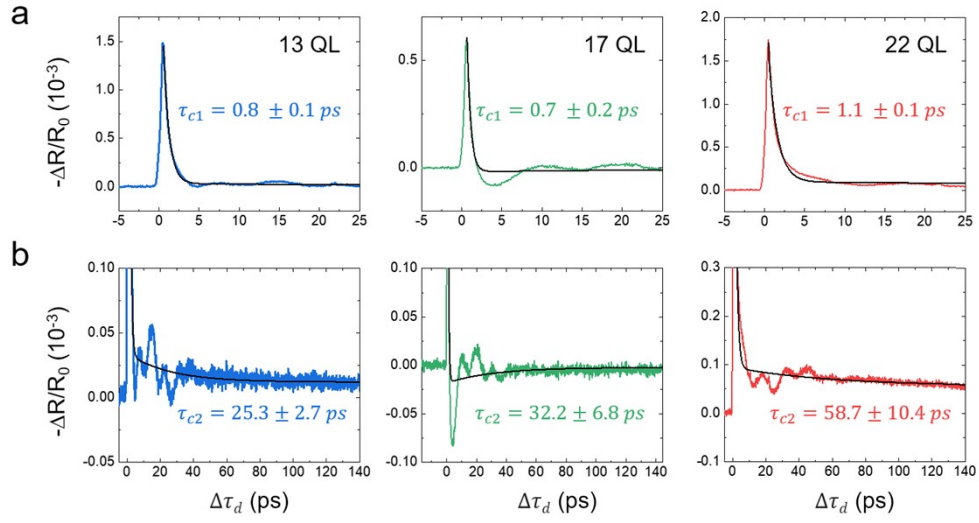

**Fig. S1.** Transient reflectivity (TR) signals in 13, 17 and 22 QL Bi<sub>2</sub>Se<sub>3</sub>. The TR traces are shown at **(a)** short and **(b)** long range of the time delay for a convenient display showing fast and slow decay components. The obtained decay constants are listed in each plot.

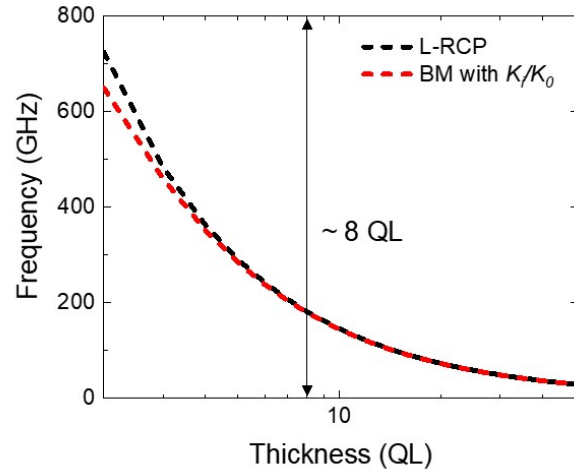

**Fig. S2.** Calculated frequencies of breathing mode (BM) and longitudinal resonant coherent phonon (L-RCP) mode without substrate coupling effect (free standing).

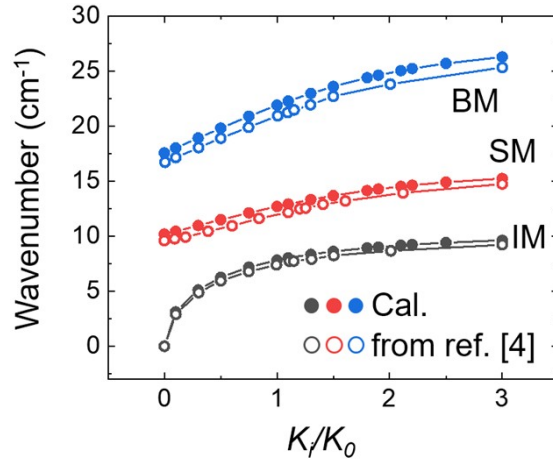

**Fig. S3.** Comparison of the calculated interlayer eigenmodes of 3 QL  $\text{Bi}_2\text{Te}_3$  based on the modified linear chain model including substrate effect with DFT results taken from Ref. 1 in a unit of wavenumber ( $\text{cm}^{-1}$ ). The parameters of mass density<sup>1</sup> ( $\mu = 7.5 \times 10^{-6} \text{ kgm}^{-2}$ ) and out-of- and in-plane force constants<sup>1</sup> ( $K_z = 8.21 \times 10^{19} \text{ Nm}^{-3}$  and  $K_x = 2.76 \times 10^{19} \text{ Nm}^{-3}$ ) of  $\text{Bi}_2\text{Te}_3$  were used in the calculation.

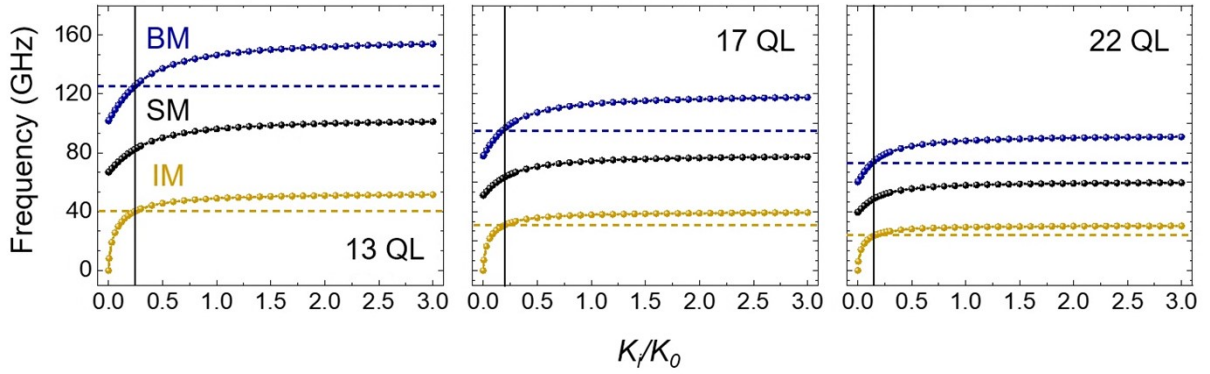

**Fig. S4.** Calculated frequencies of interface mode (IM), shear mode (SM), and breathing mode (BM) according to  $K/K_0$ . The horizontal dashed lines indicate the observed frequencies for fast (royal color) and slow modes (orange), respectively. The vertical lines denote the intersectional line for  $K/K_0$  that simultaneously satisfies the BM and IM frequencies with the experimental values of fast and slow modes.

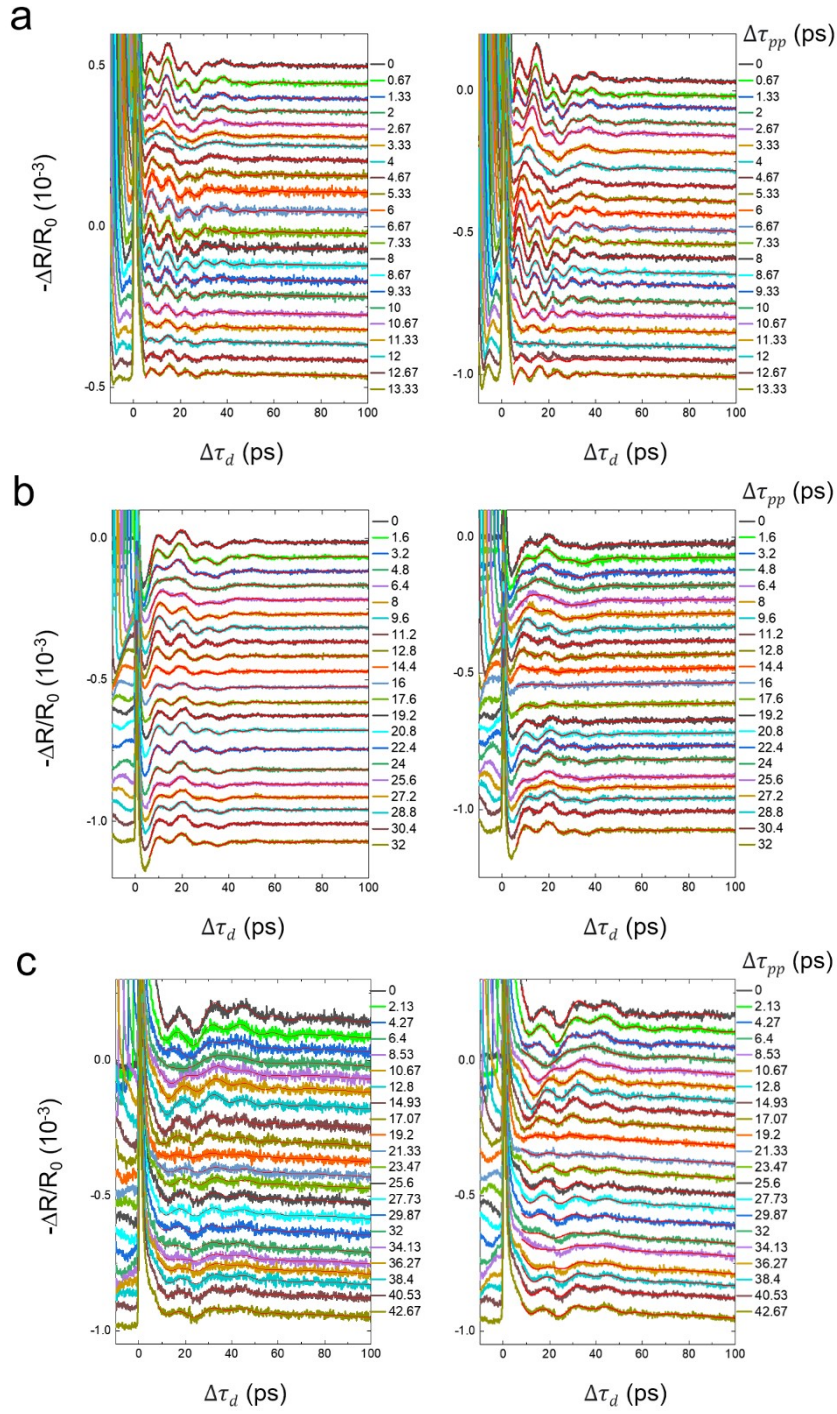

**Fig. S5.** Coherently controlled interlayer vibration traces in **(a)** 13, **(b)** 17, and **(c)** 22 QL Bi<sub>2</sub>Se<sub>3</sub> at various delays between two pump pulses ( $\Delta\tau_{pp}$ ). The red curves are fitting results based on Equation (1) in the main text.

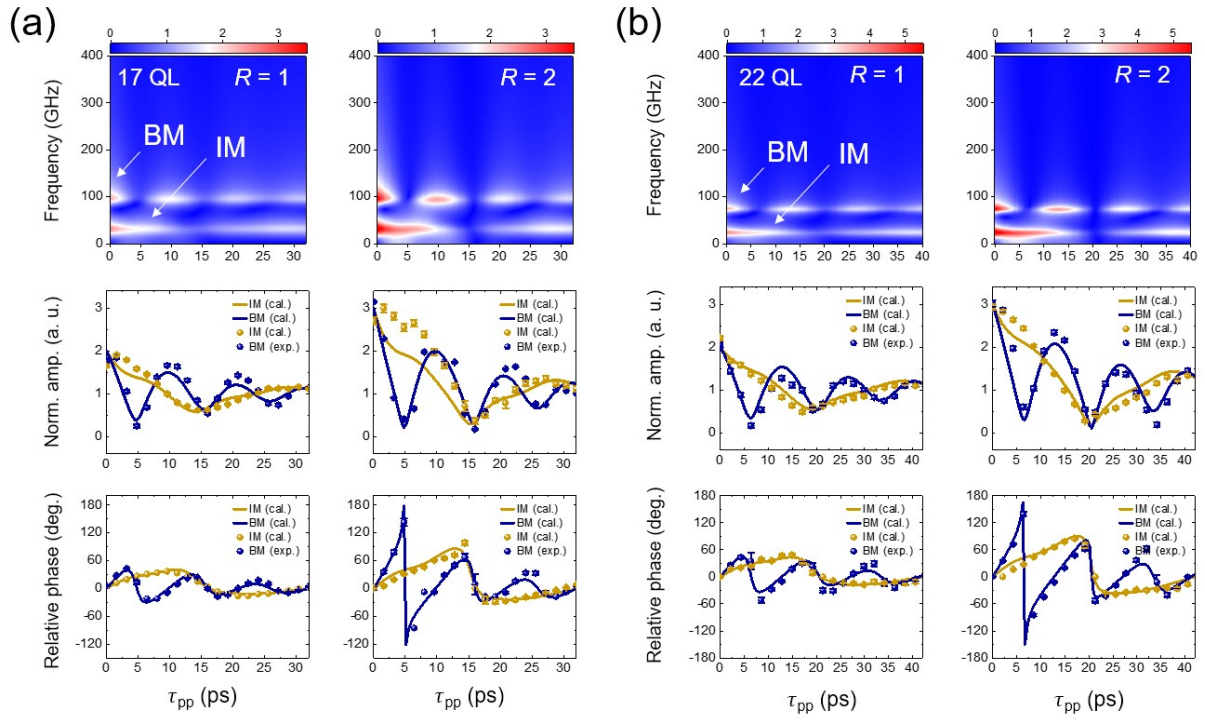

**Fig. S6.** Comparison of the simulated spectral responses of controlled interlayer vibrations with experimental results. **(a, b)** Simulated results based on coherent control of interlayer vibrations of 17 and 22 QL  $\text{Bi}_2\text{Se}_3$  in the spectral domain. **(c, d)** Normalized amplitudes and **(e, f)** relative phases of controlled interlayer vibrations according to  $\Delta\tau_{pp}$ . The solid lines with beige and blue color are the simulated results taken from (a, b). The dots with the same color are experimental results obtained from Figure S2.

## References

1. Zhao, Y.; Luo, X.; Zhang, J.; Wu, J.; Bai, X.; Wang, M.; Jia, J.; Peng, H.; Liu, Z.; Quek, S. Y., Interlayer Vibrational Modes in Few-Quintuple-Layer  $\text{Bi}_2\text{Te}_3$  and  $\text{Bi}_2\text{Se}_3$  Two-Dimensional Crystals: Raman Spectroscopy and First-Principles Studies. *Phys. Rev. B* **2014**, *90* (24), 245428.
